# Supplementary material for: The effect of a hydrogen bond on the supramolecular self-aggregation mode and the extent of metal-free benzoxazole-substituted phthalocyanines
Source: Royal Society of Chemistry journal article supplement (doi:10.1039/c5nj00494b), 2015-01-01
Supplement: c5nj00494b1.pdf [file c5nj00494b1.pdf]

## Effect of hydrogen bond on supramolecular self-aggregation mode and extent of metal-free benzoxazole-substituted phthalocyanines

Yinghui Bian, Jinshe Chen, Shaotang Xu, Yulu Zhou, Lijun Zhu, Yuzhi Xiang and Daohong Xia\*

State Key Laboratory of Heavy Oil Processing, China University of Petroleum (East China), Qingdao 266580, China.

Submitted to New Journal of Chemistry

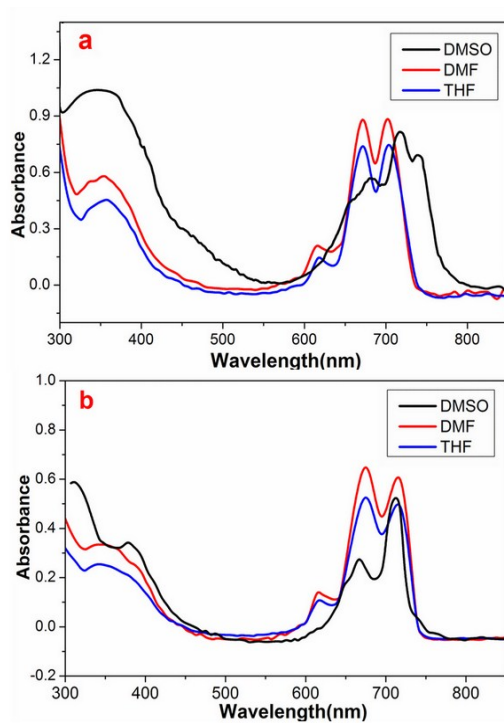

**Fig.S1.** Electronic absorption spectra of TBIT-Pc (a) and TBTT-Pc (b) in DMSO, DMF and THF. The measured concentration is  $2.5 \times 10^{-5}$  M.
